# Supplementary material for: Competition and resource depletion shape the thermal response of population fitness in Aedes aegypti
Source: PubMed Central journal article supplement (PMC8770499; doi:10.1038/s42003-022-03030-7), 2022-01-19
Supplement: 42003_2022_3030_MOESM2_ESM.pdf [file 42003_2022_3030_MOESM2_ESM.pdf]

## Supplementary File 1

### Competition and resource depletion shape the thermal response of population fitness in *Aedes aegypti*

#### Supplementary Note 1

*Method used to predict fecundity rate for matrix projection models (main text Equation 1)*

We measured each individual's dry mass to the nearest 0.01 mg using a microbalance. Prior to weighing, mosquitoes were dried individually in microcentrifuge tubes containing desiccant-silica gel for a minimum of 14 days. For the temperature-dependent scaling between mass and wing length, we analysed the van Heuvel<sup>1</sup> dataset. This showed that as temperatures increase from 25 to 34°C, the scaling between mass and wing length changes significantly (Supplementary Figure 1a). Our analysis of the Farjana<sup>2</sup> dataset indicated that the scaling between wing length and fecundity changes significantly with temperature but not resource level (Supplementary Figure 1b).

To estimate lifetime fecundity ( $F$  in Supplementary Equation 1) from mass for mosquitoes that we reared at 22°C at all food densities, we predicted wing length from mass using the mass-to-wing length exponent at 25°C in the van Heuvel<sup>1</sup> dataset. We used these wing lengths to predict fecundity using the wing length-to-fecundity scaling exponent from the Farjana<sup>2</sup> ( $n = 264$ ,  $R^2 = 0.87$ ,  $P < 0.001$ ; Supplementary Equation 1) dataset at their at 20°C.

For mosquitoes that we reared at 26°C, there is no corresponding temperature treatment in the Farjana<sup>2</sup> dataset, so we first predicted wing length from mass using the mass-to-wing length exponent at 25°C in the van Heuvel<sup>1</sup> dataset. We then predicted fecundity using the wing length-to-fecundity scaling from the Briegel<sup>3</sup> dataset at 27°C ( $n = 206$ ,  $R^2 = 0.77$ ,  $P < 0.001$ ; Supplementary Equation 1). For mosquitoes that we reared at 32 and 34°C, we predicted wing length from mass using the mass-to-wing length exponent at 34°C in the in the van Heuvel<sup>1</sup> dataset. We then predicted fecundity for these mosquitoes using the wing length-to-fecundity scaling exponent from the Farjana<sup>2</sup> (Supplementary Equation 1) dataset at 30°C. Fecundity was not estimated at 36°C, as no adults emerged at this temperature. **The scaling equations used to estimate temperature-dependent fecundity from wing length for our mosquitoes are:**

$$\begin{aligned} 22^\circ\text{C}, F &= 0.93 + 3.16 \log(L) \\ 26^\circ\text{C}, F &= 0.40 + 3.80 \log(L) && \text{(Supplementary} \\ 32^\circ\text{C}, F &= 0.26 + 4.08 \log(L) && \text{Equation 1)} \\ 34^\circ\text{C}, F &= 0.26 + 4.08 \log(L) \end{aligned}$$

The coefficients were derived from our analysis (Supplementary Figure 1) of the Farjana<sup>2</sup> and Briegel<sup>3</sup> datasets.

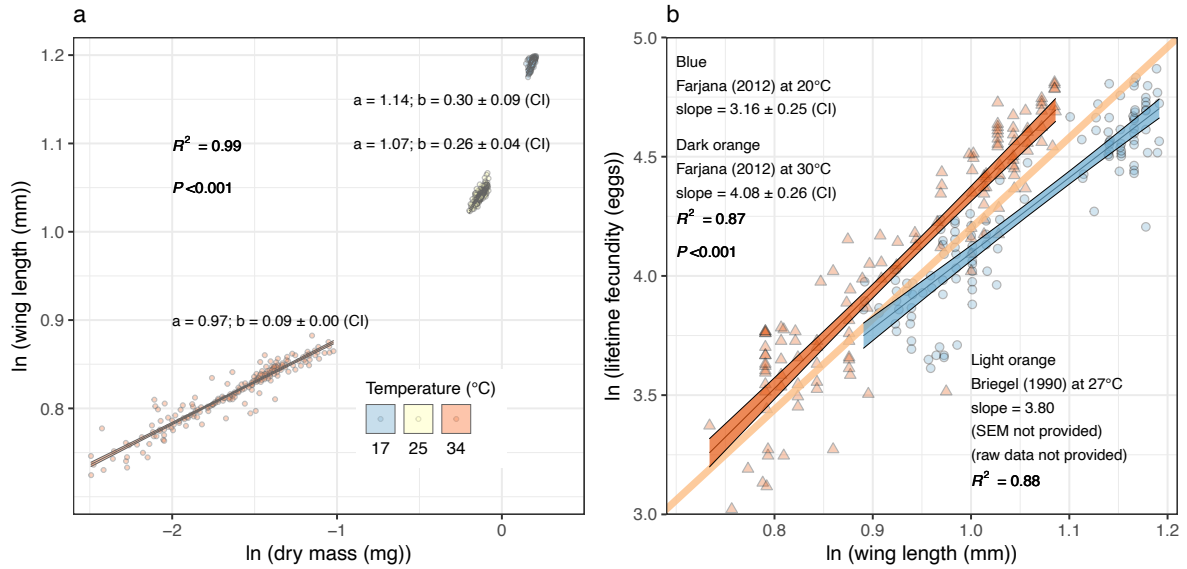

**Supplementary Figure 1.** **a** Analysis of the van Heuvel<sup>1</sup> dataset shows that the scaling of mass and wing length in *Ae. Aegypti* is temperature-dependent. The scaling exponents (slopes) for 17°C and 25°C are significantly higher than at 34°C. However, the higher scaling exponent for 17°C is non-significantly higher than for 25°C. **b** Analysis of the Farjana<sup>2</sup> dataset shows that the scaling of wing length and fecundity in *Ae. Aegypti* is temperature-dependent. The scaling exponents (slopes) for both resource levels are significantly higher at 30°C than at 20°C. However, the effect of resource on fecundity is non-significant at the temperature level (not shown). The standard error for the scaling exponent at 27°C is not shown because it is not provided in<sup>3</sup>, so for 26°C, we assumed a similar 95% CI to those in the Farjana<sup>2</sup> dataset ( $3.80 \pm 0.25$ ). Despite these assumptions relating to fecundity, our  $r_m$  calculations are robust to uncertainty/variation in the underlying scaling and temperature dependencies (Figure 4).

| Model terms                                 | Model name         | AIC            | $\Delta$ AIC | df        |
|---------------------------------------------|--------------------|----------------|--------------|-----------|
| <b>Temperature <math>\times</math> RL</b>   | <b>Interaction</b> | <b>6446.77</b> | <b>0</b>     | <b>20</b> |
| Temperature $\times$ RL + replicate + block | Maximal            | 6450.89        | +4.12        | 23        |
| Temperature $\times$ RL + replicate         | No block           | 6448.89        | +2.13        | 22        |
| Temperature + RL                            | No interaction     | 6462.33        | +15.56       | 8         |
| Temperature                                 | Temperature only   | 6481.32        | +34.55       | 5         |
| Resource                                    | Resource only      | 6899.22        | +452.46      | 4         |
| None                                        | Null               | 6906.62        | +459.86      | 1         |

**Supplementary Table 1.** Simplification of the exponential juvenile survival model. The maximal model includes the effects of temperature  $\times$  resource level (RL) + replicate + block on mortality. The final mortality model was obtained by dropping terms from the maximal model. If removing a term worsened model fit ( $\Delta$ AIC  $>$  -2), then it was retained. Otherwise, it was removed.  $\Delta$ AICs were calculated as differences from the interaction model (bold).

| Resource level (mg ml <sup>-1</sup> ) | Model name              | AIC    | df |
|---------------------------------------|-------------------------|--------|----|
| 0.183                                 | Kamykowski <sup>4</sup> | -44.43 | 10 |
| 0.183                                 | Lactin2 <sup>5</sup>    | -42.77 | 11 |
| 0.367                                 | Kamykowski <sup>4</sup> | -65.53 | 10 |
| 0.367                                 | Lactin2 <sup>5</sup>    | -67.77 | 11 |
| 0.550                                 | Kamykowski <sup>4</sup> | -61.31 | 10 |
| 0.550                                 | Lactin2 <sup>5</sup>    | -63.61 | 11 |
| 0.733                                 | Kamykowski <sup>4</sup> | -53.82 | 10 |
| 0.733                                 | Lactin2 <sup>5</sup>    | -56.40 | 11 |

**Supplementary Table 2.** Comparison of model fitting for  $r_m$  TPCs by resource level. We considered several models that allow for negative values at both cold and hot extremes, including polynomial regression models (quadratic models underfitted the matrix projection  $r_m$  estimates, whereas cubic models overfitted these estimates (not shown) and other TPC models (not shown) that are implemented in the rTPC<sup>6</sup> R package. Overall, the Lactin2<sup>5</sup> function and Kamykowski<sup>4</sup> model best described the matrix projection estimates according to the Akaike Information Criterion (AIC). Although these models performed similarly according to their AICs, we chose the Kamykowski<sup>4</sup> model because it was better at describing the estimated  $r_m$  at our lowest resource level.

## Supplementary References

1. van den Heuvel, M. J. The Effect of Rearing Temperature on the Wing Length, Thorax Length, Leg Length and Ovariolo Number of the Adult Mosquito, *Aedes Aegypti* (L.). *Transactions of the Royal Entomological Society of London* **115**, 197–216 (1963).
2. Farjana, T. & Tuno, N. Effect of body size on multiple blood feeding and egg retention of *Aedes aegypti* (L.) and *Aedes albopictus* (Skuse) (Diptera: Culicidae). *Medical Entomology and Zoology* **63**, 123–131 (2012).
3. Briegel, H. Metabolic relationship between female body size, reserves, and fecundity of *Aedes aegypti*. *Journal of Insect Physiology* **36**, 165–172 (1990).
4. Kamykowski, D. & McCollum, S. A. The temperature acclimatized swimming speed of selected marine dinoflagellates. *Journal of Plankton Research* **8**, 275–287 (1986).
5. Lactin, D. J., Holliday, N. J., Johnson, D. L. & Craigen, R. Improved Rate Model of Temperature-Dependent Development by Arthropods. *Environmental Entomology* **24**, 68–75 (1995).
6. Padfield, D., O’Sullivan, H. & Pawar, S. rTPC and nls.multstart: A new pipeline to fit thermal performance curves in R. *Methods in Ecology and Evolution* **12**, 1138–1143 (2021).
