# Supplementary material for: Competition and resource depletion shape the thermal response of population fitness in Aedes aegypti
Source: PubMed Central journal article supplement (PMC8770499; doi:10.1038/s42003-022-03030-7), 2022-01-19
Supplement: 42003_2022_3030_MOESM3_ESM.pdf [file 42003_2022_3030_MOESM3_ESM.pdf]

## Description of Additional Supplementary Data

1

2

3 **File name:** Supplementary Data 1

4 **Description:** Contains the source data for Figure 1, and Tables 1 and 2.

5

6 **File name:** Supplementary Data 2

7 **Description:** Contains the source data for Figure 2 and Table 2.

8

9 **File name:** Supplementary Data 3

10 **Description:** Contains the source data for Figure 3.

11

12 **File name:** Supplementary Data 4

13 **Description:** Contains the source data for Figure 4.
